# Supplementary material
Source: Research Square preprint supplement (doi:10.21203/rs.3.rs-9852390/v1)
Supplement: Supplementary file 1 [file 7436c0f56ec0e0cea53a359f.xlsx]

## Sheet: Table 1
Table 1. Patient characteristics
Variable		n = 50
Age (years)		56.9 ± 16.1
Sex (male/female)		26/24
Height (cm)		162.6 ± 8.7
Weight (kg)		61.1 ± 14.5
Preoperative hemoglobin (g/dL)		12.5 ± 1.9
Preoperative hematocrit (%)		37.8 ± 5.3
Intraoperative blood loss (mL)		350 [135–1,344]*
Intraoperative fluid balance (mL)		2033 ± 1233
Surgical procedure
Hepatic surgery (including laparoscopic)		25
Gynecological surgery		5
Spine surgery		5
Retroperitoneal/pelvic tumor		4
Gastrointestinal surgery		4
Vascular surgery		3
Transplantation (liver/kidney)		3
Urological surgery		1
Data are presented as mean ± SD or *median [interquartile range: Q1–Q3].

## Sheet: Table 2
Table 2. Cross-tabulation of directional changes in Hb between MEK-1301 and SpHb (after exclusion zone filtering, n = 37)
	SpHb increase	SpHb decrease	Total
MEK-1301 increase	5 (55.6%)	4 (44.4%)	9
MEK-1301 decrease	0 (0%)	28 (100%)	28
Total	5	32	37
